# Supplementary material for: Assessing the Impact of Prolonged Averaging of Coronary Continuous Thermodilution Traces
Source: MDPI journal article supplement (doi:10.3390/diagnostics14030285), 2024-01-28
Supplement: s1 [file s1]

## Supplemental Materials

**Supplementary Table S1.** Formulas for the calculation of Continuous Thermodilution indices

| Index           | Formula                                            |
|-----------------|----------------------------------------------------|
| FFR             | $\frac{P_{d,hyper}}{P_{a,hyper}}$                  |
| $R_{\mu,hyper}$ | $\frac{P_{d,hyper}}{Q_{hyper}}$                    |
| CFR             | $\frac{Q_{hyper}}{Q_{rest}}$                       |
| MRR             | $\frac{CFR}{FFR} * \frac{P_{a,rest}}{P_{a,hyper}}$ |

Where “FFR” = Fractional Flow Reserve, “ $R_{\mu,hyper}$ ” = Hyperemic Microvascular Resistance, “CFR” = Coronary Flow Reserve, “MRR” = Microvascular Resistance Reserve, “ $P_d$ ” = Distal Coronary Pressure, “ $P_a$ ” = Aortic Pressure, “Q” = Absolute Flow, “rest” = resting state, “hyper”= hyperemic state.

**Supplementary Table S2.** Continuous thermodilution indices derived with a 10 second moving average filter, compared to 2 seconds average as a reference standard.

|                      | 10 Second Moving Average Filter |              |
|----------------------|---------------------------------|--------------|
|                      | Mean Bias (95%CI)               | R            |
| Q <sub>rest</sub>    | 1.81 (1.02 – 2.59)              | 0.98 p<0.001 |
| Q <sub>hyper</sub>   | -2.47 (-4.53 – -0.41)           | 0.98 p<0.001 |
| R <sub>μ,hyper</sub> | 4.08 (0.22 – 7.95)              | 0.98 p<0.001 |
| CFR                  | -0.09 (-0.12 – -0.06)           | 0.96 p<0.001 |
| MRR                  | -0.11 (-0.15 – -0.07)           | 0.96 p<0.001 |

“CI” = Confidence Interval, “Q<sub>rest</sub>” = resting absolute flow, “Q<sub>hyper</sub>” = hyperemic absolute flow, “R<sub>μ,hyper</sub>” = hyperemic microvascular resistance, “CFR” = Coronary Flow Reserve, “MRR” = Microvascular Resistance Reserve, “R” = Pearson’s r correlation.

**Supplementary Table S3.** Reproducibility data for continuous thermodilution derived indices at 2 and 10 second averages. Traces visualised with the default 2 second moving average filter for both.

|                      | 2 Second Average |             |      |      |             | 10 Second Average |             |      |      |             |
|----------------------|------------------|-------------|------|------|-------------|-------------------|-------------|------|------|-------------|
|                      | Test 1           | Test 2      | R    | ICC  | Var (%)     | Test 1            | Test 2      | R    | ICC  | Var (%)     |
| CFR                  | 2.73 ± 0.80      | 2.61 ± 0.82 | 0.74 | 0.73 | 17.8 ± 12.4 | 2.62 ± 0.72       | 2.57 ± 0.77 | 0.75 | 0.75 | 15.4 ± 11.1 |
| MRR                  | 3.27 ± 0.95      | 3.22 ± 0.97 | 0.72 | 0.72 | 16.5 ± 12.4 | 3.15 ± 0.88       | 3.15 ± 0.92 | 0.75 | 0.75 | 15.2 ± 11.2 |
| R <sub>μ,hyper</sub> | 408 ± 142        | 398 ± 129   | 0.88 | 0.88 | 11.9 ± 9.9  | 413 ± 140         | 402 ± 135   | 0.89 | 0.89 | 11.5 ± 9.8  |
| Q <sub>rest</sub>    | 79 ± 28          | 86 ± 32     | 0.73 | 0.70 | 20.3 ± 16.0 | 80 ± 27           | 87 ± 33     | 0.77 | 0.74 | 19.3 ± 14.5 |
| Q <sub>hyper</sub>   | 207 ± 73         | 216 ± 81    | 0.87 | 0.86 | 12.5 ± 11.1 | 201 ± 67          | 215 ± 81    | 0.89 | 0.86 | 12.4 ± 10.9 |

“Q<sub>rest</sub>” = resting absolute flow, “Q<sub>hyper</sub>” = hyperemic absolute flow, “R<sub>μ,hyper</sub>” = Hyperemic microvascular resistance, “CFR” = Coronary Flow Reserve, “MRR” = Microvascular Resistance Reserve, “R” = Pearson’s r, “ICC” = Intraclass Correlation Coefficient, “Var(%)” = Variability Percentage, “Test 1” = First continuous thermodilution measurement, “Test 2” = Second continuous thermodilution measurement.

**Supplementary Figure S1.** Scatter plots of 2 second average indices (x-axis), against 10 second average indices (y-axis).  $A = Q_{rest}$ ,  $B = Q_{hyper}$ ,  $C = R_{\mu,hyper}$ ,  $D = CFR$ ,  $E = MRR$ .

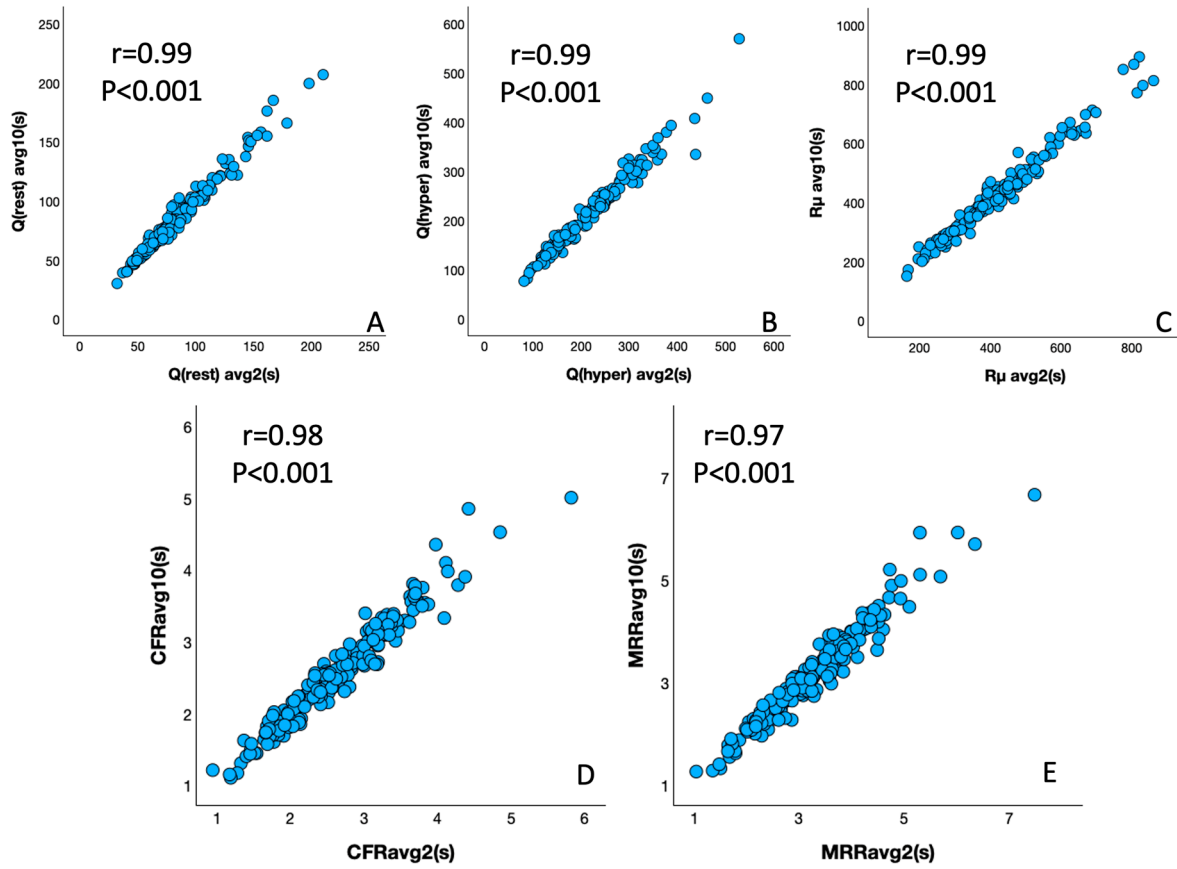

“Q” = Absolute flow, “avg2(s)” = average of 2 seconds, “avg10(s)” = Average of 10 seconds,

“ $R_{\mu}$ ” = Hyperemic microvascular resistance, “CFR” = Coronary Flow Reserve, “MRR” = Microvascular Resistance Reserve.
